# Supplementary material for: A Specific Mini‐Intrabody Mediates Lysosome Degradation of Mutant Huntingtin
Source: PubMed Central journal article supplement (PMC10625127; doi:10.1002/advs.202301120), 2023-09-08
Supplement: ADVS-10-2301120-s001.pdf [file ADVS-10-2301120-s001.pdf]

## Supporting Information

for *Adv. Sci.*, DOI 10.1002/advs.202301120

A Specific Mini-Intrabody Mediates Lysosome Degradation of Mutant Huntingtin

*Caijuan Li, Yingqi Lin, Yizhi Chen, Xichen Song, Xiao Zheng, Jiawei Li, Jun He, Xiusheng Chen, Chunhui Huang, Wei Wang, Jianhao Wu, Jiayi Wu, Jiale Gao, Zhuchi Tu, Xiao-Jiang Li\*, Sen Yan\* and Shihua Li\**

## Supplementary Materials

### **A specific mini-intrabody mediates lysosomal degradation of mutant huntingtin**

**Authors:** Caijuan Li<sup>1,2†</sup>, Yingqi Lin<sup>1,2†</sup>, Yizhi Chen<sup>1</sup>, Xichen Song<sup>1</sup>, Xiao Zheng<sup>1</sup>, Jiawei Li<sup>1</sup>, Jun He<sup>3</sup>, Xiusheng Chen<sup>1</sup>, Chunhui Huang<sup>1</sup>, Wei Wang<sup>1</sup>, Jianhao Wu<sup>1</sup>, Jiayi Wu<sup>1</sup>, Jiale Gao<sup>1</sup>, Zhuchi Tu<sup>1</sup>, Xiao-Jiang Li<sup>1\*</sup>, Sen Yan<sup>1,2\*</sup>, Shihua Li<sup>1\*</sup>

#### **Affiliations:**

<sup>1</sup>Guangdong Key Laboratory of Non-human Primate Research, Key Laboratory of CNS Regeneration (Ministry of Education), GHM Institute of CNS Regeneration, Jinan University, Guangzhou, China 510632.

<sup>2</sup>School of Medicine, Jinan University, Guangzhou 510632, China.

<sup>3</sup>Institute of Laboratory Animal Science, Jinan University, Guangzhou, China.

\*Corresponding authors:

xjli33@jnu.edu.cn;231yansen@163.com;lishihualis@jnu.edu.cn

†These authors contributed equally to this work

#### **Content**

#### **Supplementary Figures 1-7**

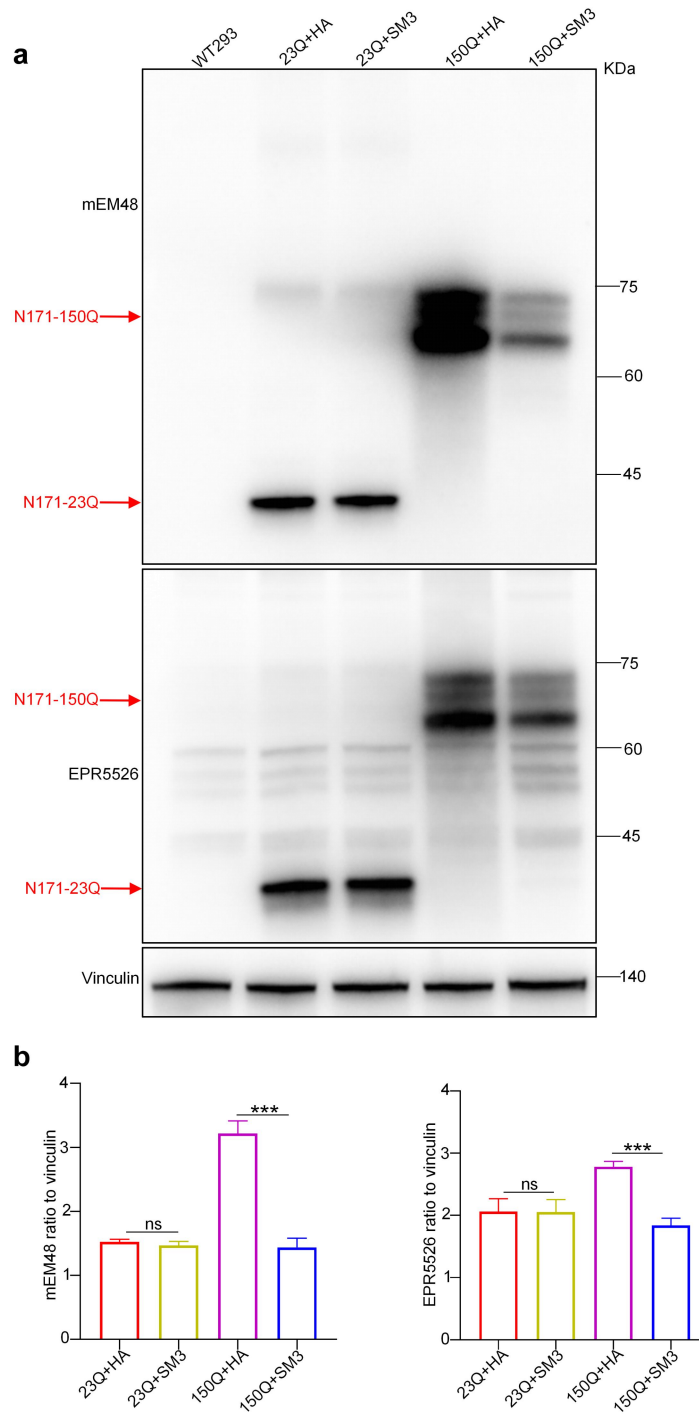

**Figure S1. Comparison of N-terminal HTT-23Q and -150Q binding to SM3. a)** Western blotting analysis of the transfected 293T cells and HTT N171-23Q or -150Q with two anti-HTT antibodies. **b)** Quantification of the ratios of HTT recognized by HTT antibodies (mEM48 and EPR5526) to vinculin on the western blots. The data were obtained from four independent experiments ( $n = 4$ ). Data were analyzed by Student's *t* test and presented as mean  $\pm$  SEM. \*\*\* $P=0.0003$  (mEM48); \*\*\* $P=0.0006$  (EPR5526).

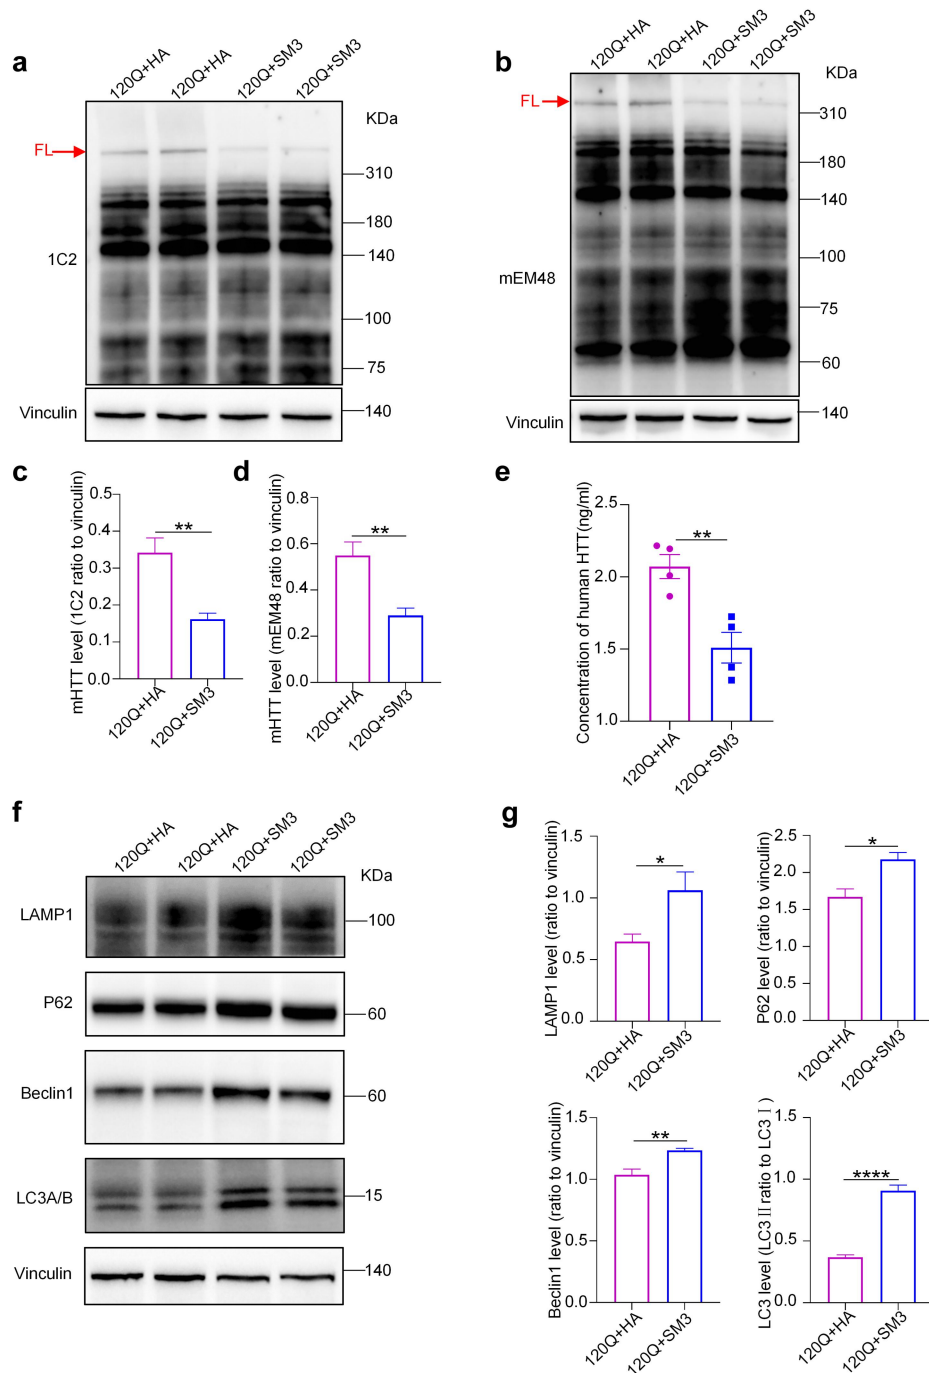

**Figure S2. Analysis of the effect of SM3 on the full-length HTT-120Q transfected 293 cells.** **a, b)** Western blotting analysis of the full-length HTT-120Q stably expressed 293T cells, which were transfected with SM3 or vector expressing HA only. Full-length mHTT (arrow pointed) were detected with 1C2 or mEM48 antibodies. **c, d)** Quantitation of the ratios of mHTT detected by 1C2 or mEM48 to vinculin on the western blots. The data were obtained from four independent experiments (n = 4). Data are analyzed by two-tailed Student's t test and presented as mean  $\pm$  SEM; \*\**P* = 0.0058 (1C2); \*\**P* = 0.0081(mEM48). **e)** Quantification of human HTT using ELISA. n = 4 per group. Data were analyzed by two-tailed Student's t test and presented as mean  $\pm$  SEM. \*\**P*=0.0058. **f)** Western blot analysis of HTT-120Q 293 cells transfected with SM3 or the vector expressing HA only. The

blots were probed with LAMP1, P62, Beclin 1 and LC3 antibodies. Vinculin served as a loading control. **g)** Quantitation of the ratios of LAMP1, P62 and Beclin 1 to vinculin on the western blots, and quantitation of the ratios of LC3II to LC3I (LC3A/B) on the western blots. The data were obtained from four independent experiments ( $n = 4$ ). Data are analyzed by two-tailed Student's *t* test and presented as mean  $\pm$  SEM. LAMP1:  $*P = 0.0304$ . P62:  $*P = 0.0124$ . Beclin 1:  $**P = 0.007$ . LC3:  $****P < 0.0001$ .

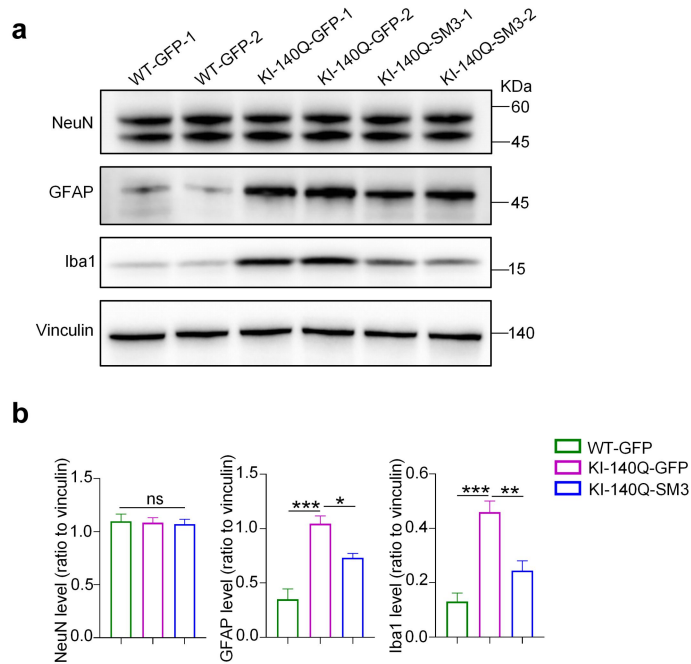

**Figure S3. Analysis of the HD KI-140Q mouse brain injected with SM3. a)** Western blotting analysis of the expression of neuronal (NeuN) and glial (GFAP, Iba1) proteins in the striatum of HD KI-140Q and wild type (WT) mice injected with GFP (control) or SM3 at 7 months of age. **b)** Quantification of the ratios of NeuN, GFAP, and Iba1 to vinculin on the western blots. The data were obtained from four independent experiments ( $n = 4$ ). Data were analyzed by one-way ANOVA with Dunnett's multiple comparisons test and are presented as mean  $\pm$  SEM. GFAP:  $*P = 0.0249$ ;  $***P = 0.0002$ . Iba1:  $**P = 0.0044$ ;  $***P = 0.0003$ .

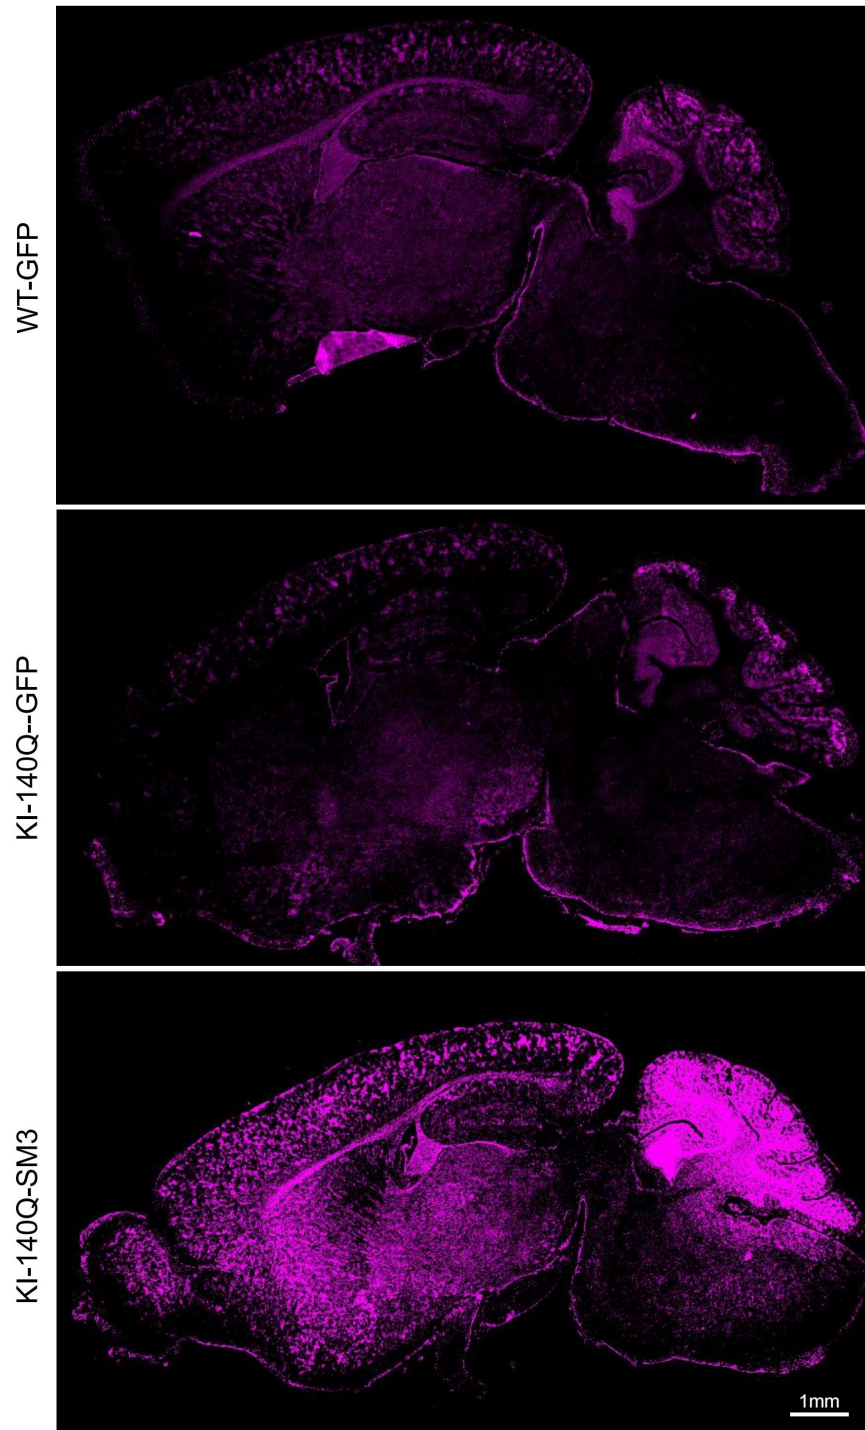

**Figure S4. Sagittal images of HA antibody immunofluorescent staining of SM3 in the HD KI-140Q mouse brain.**



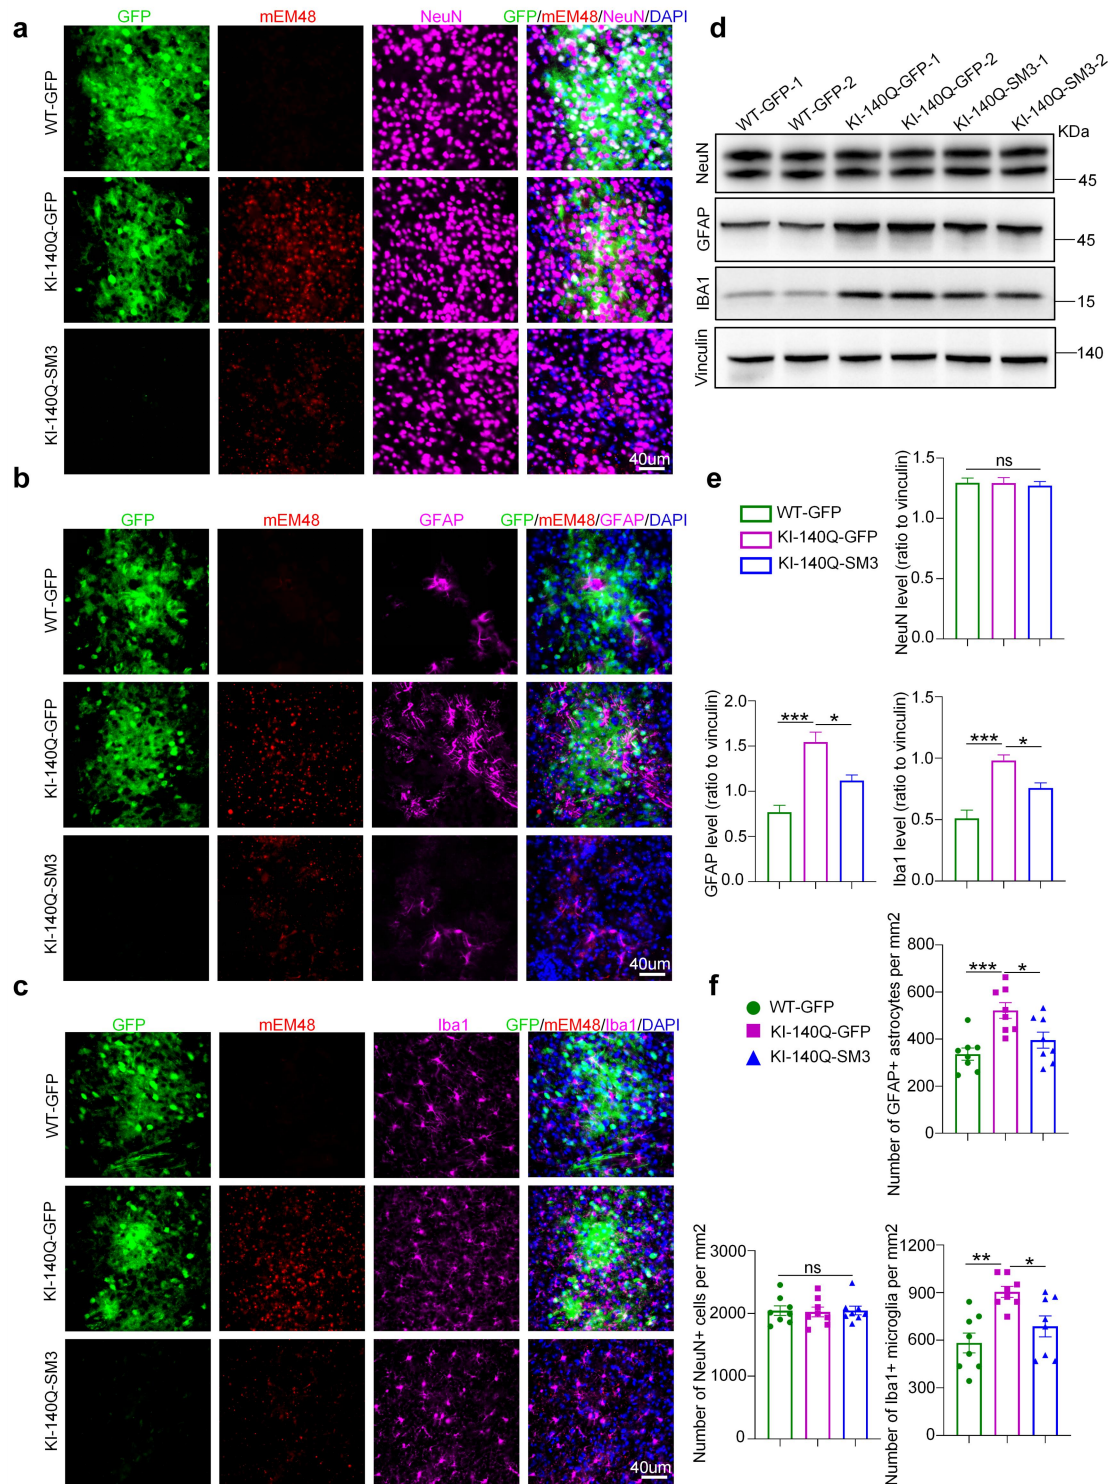

**Figure S5. Analysis of HD KI-140Q mouse brain after intravenous injection of SM3.** Immunostaining and western blotting of HD KI-140Q mouse striatum one month after intravenous injection of SM3. **a-c)** Representative immunofluorescent fluorescent images of the striatum from GFP or SM3 injected HD KI-140Q mice. Antibodies for NeuN, GFAP and Iba1 were used. All the sections were stained with mEM48 and anti-GFP as well as DAPI. GFP injection was used as control. Note that the numbers of NeuN-positive neurons did not change in HD KI-140Q mice in all treatments. SM3 injection significantly reduced gliosis

shown by GFAP or Iba1 staining. Scale bars: 40  $\mu\text{m}$ . **d)** Western blotting analysis of neuronal (NeuN) and glial (GFAP, Iba1) proteins in the HD KI-140Q or WT mice injected with GFP or SM3. **e)** Quantification of the ratios of NeuN, GFAP, and Iba1 to vinculin on the western blots. The data were obtained from four independent experiments ( $n = 4$ ). Data were analyzed by one-way ANOVA with Dunnett's multiple comparisons test and presented as mean  $\pm$  SEM. GFAP: \*\*\* $P = 0.0002$ ; \* $P = 0.0107$ . Iba1: \*\*\* $P = 0.0003$ ; \* $P = 0.0257$ . **f)** Quantification of the NeuN, GFAP, Iba1 immunostaining. Data are analyzed by one-way ANOVA with Dunnett's multiple comparisons test and presented as mean  $\pm$  SEM.  $n = 8$  mice per group; GFAP: \* $P = 0.0183$  (WT-GFP versus HD KI-140Q+SM3); \*\*\* $P = 0.0008$  (WT-GFP versus HD KI-140Q). Iba1: \* $P = 0.0228$  (WT-GFP versus HD KI-140Q+SM3); \*\* $P = 0.0011$  (WT-GFP versus HD KI-140Q).



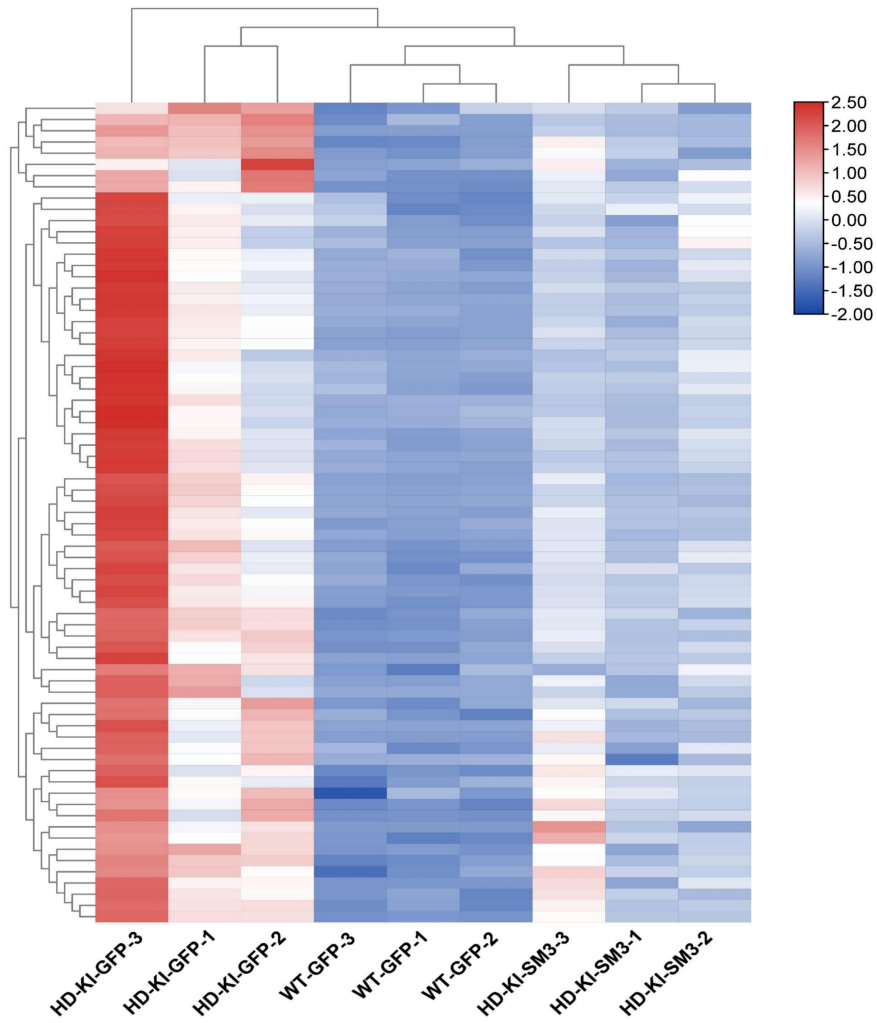

**Figure S6. RNA-seq analysis of HD-KI mice after SM3 treatment.** Total RNAs from WT and HD KI-140Q treated with GFP or SM3 were examined. The striatum from three animals of each group were examined. The mice at 6 months of age were stereotaxically injected with AAV and then their striatal tissues were isolated for RNA-seq analysis one month after injection. The heat map of the RNA-seq analysis reveals the alterations in the transcripts related to immune and inflammatory responses in HD KI mouse brain.

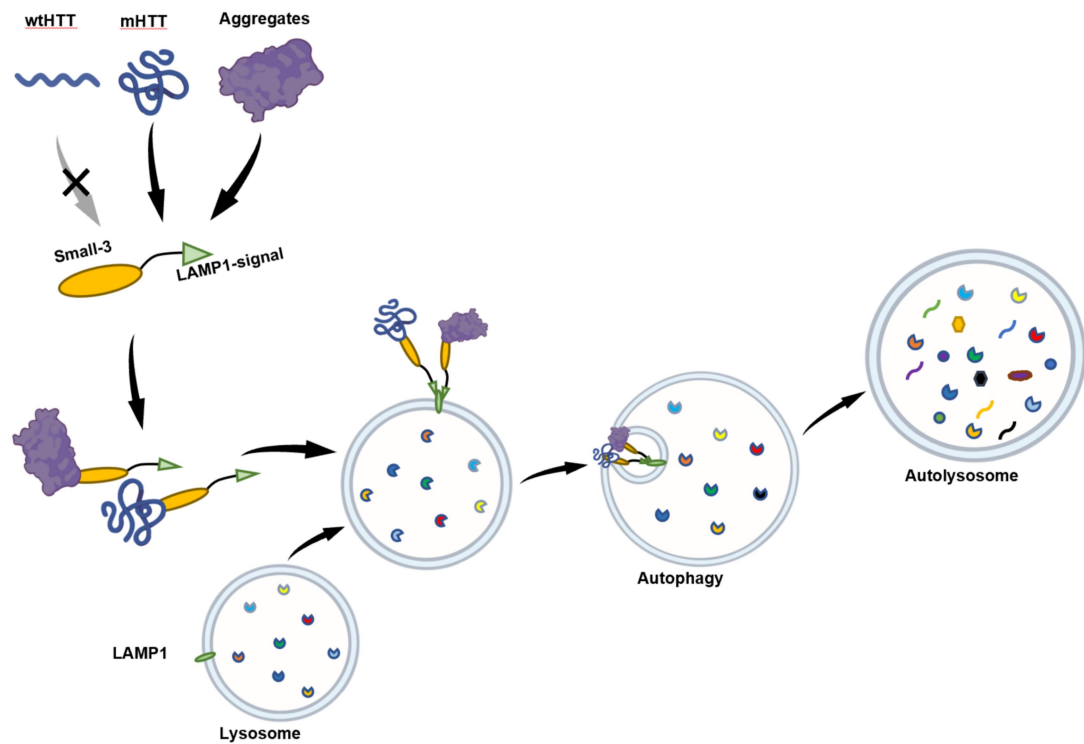

**Figure S7. A proposed model of how SM3 induces mHTT degradation.** A small peptide derived from HTT intrabody and linked with the lysosomal targeting signal can selectively bind mHTT and bring it to the lysosome for degradation.
